# Supplementary material for: Changes in Expression of Complement Components in the Ovine Spleen during Early Pregnancy
Source: MDPI journal article supplement (doi:10.3390/ani11113183), 2021-11-08
Supplement: s1 [file s1]

Table S1 Primers used for RT-qPCR

| Gene         | Primer  | Sequence                 | Size<br>(bp) | Accession<br>numbers |
|--------------|---------|--------------------------|--------------|----------------------|
| <i>Clqa</i>  | Forward | CAGGAGAACGTGTACCAGAGCAAC | 122          | XM_012152629.2       |
|              | Reverse | CTCCGAGAGGACCTGATGGACAG  |              |                      |
| <i>Clr</i>   | Forward | CCCAGACTACCGCCAGGAAGAG   | 109          | XM_012175492.2       |
|              | Reverse | TGGGAGGCAGATTGGCAGGAG    |              |                      |
| <i>ClS</i>   | Forward | CCTGGCAAGTCTTCTTCTCGAACC | 130          | XM_004006917.4       |
|              | Reverse | ACCACTGAGGAGGACCCAACATAC |              |                      |
| <i>C2</i>    | Forward | CCACCAATCCCATCCAGCAGAAG  | 95           | XM_012100922.4       |
|              | Reverse | GGCGTCCAGGAGCAGGTAGAG    |              |                      |
| <i>C3</i>    | Forward | CGCCACCAGCAGACTATAACGATC | 105          | XM_027969774.1       |
|              | Reverse | AGCAGCCTTGACCTCCACCTC    |              |                      |
| <i>C4a</i>   | Forward | TTCAGGACAGGTGGTGAGAGGATC | 167          | XM_027958803.1       |
|              | Reverse | GGAGGAGATGGAGGCGACAGAG   |              |                      |
| <i>C5b</i>   | Forward | GCTACGCTGGTGTTACTCTGGATC | 157          | XM_004003966.3       |
|              | Reverse | GCAGACATGACCTCGCCTATAAGC |              |                      |
| <i>C9</i>    | Forward | GCCGCAACAGAGTGGTGGAAG    | 138          | XM_004017026.3       |
|              | Reverse | TGCCATCCCTAACTCGGTCACAG  |              |                      |
| <i>GAPDH</i> | Forward | GGGTCATCATCTCTGCACCT     | 176          | NM_001190390.1       |
|              | Reverse | GGTCATAAGTCCCTCCACGA     |              |                      |
