# Supplementary material for: Changes in Expression of Complement Components in the Ovine Spleen during Early Pregnancy
Source: MDPI journal article supplement (doi:10.3390/ani11113183), 2021-11-08
Supplement: s1 [file s1]

Table S2 Antibodies used for Western blot

| Protein | Antibody                                                                                     |
|---------|----------------------------------------------------------------------------------------------|
| C1q     | Mouse anti-C1q monoclonal antibody (Santa Cruz Biotechnology, Santa Cruz, CA, USA, sc-53544) |
| C1r     | Mouse anti-C1r monoclonal antibody (Santa Cruz Biotechnology, sc-514105)                     |
| C1s     | Mouse anti-C1s monoclonal antibody (Santa Cruz Biotechnology, sc-365273)                     |
| C2      | Mouse anti-C2 monoclonal antibody (Santa Cruz Biotechnology, sc-373809)                      |
| C3      | Mouse anti-C3 monoclonal antibody (Santa Cruz Biotechnology, sc-28294)                       |
| C4a     | Mouse anti-C4a monoclonal antibody (Santa Cruz Biotechnology, sc-271181)                     |
| C5b     | Mouse anti-C5b monoclonal antibody (Santa Cruz Biotechnology, sc-398247)                     |
| C9      | Mouse anti-C9 monoclonal antibody (Santa Cruz Biotechnology, sc-390000)                      |
| GAPDH   | Mouse anti-GAPDH antibody (Santa Cruz Biotechnology, sc-47724)                               |
