# Supplementary figures and images for: Changes in Expression of Complement Components in the Ovine Spleen during Early Pregnancy
Source: MDPI journal article supplement (doi:10.3390/ani11113183), 2021-11-08

C1q

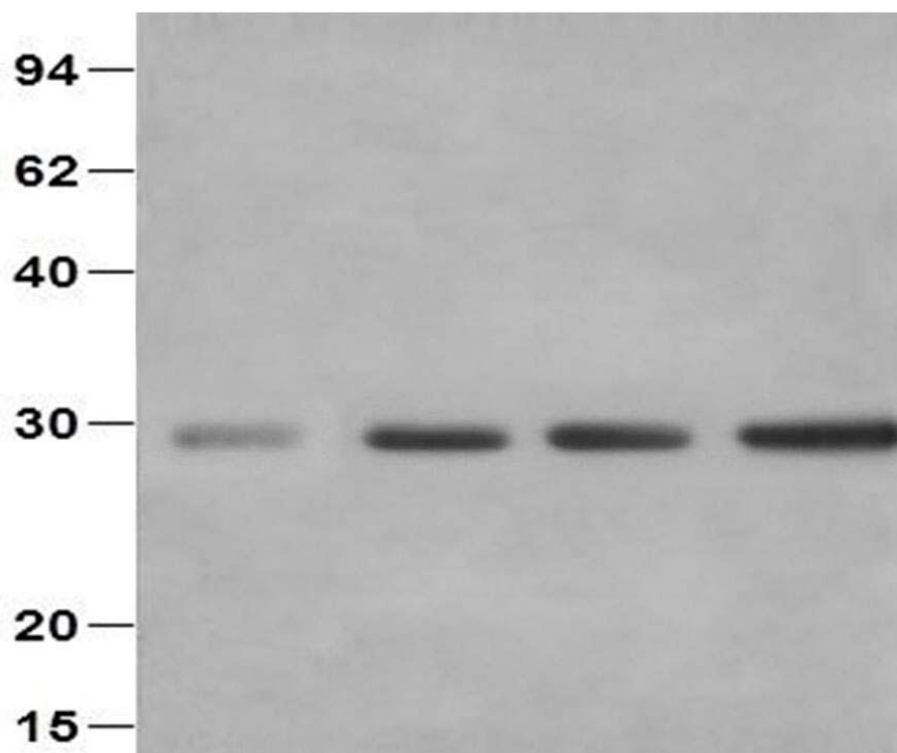

C1r

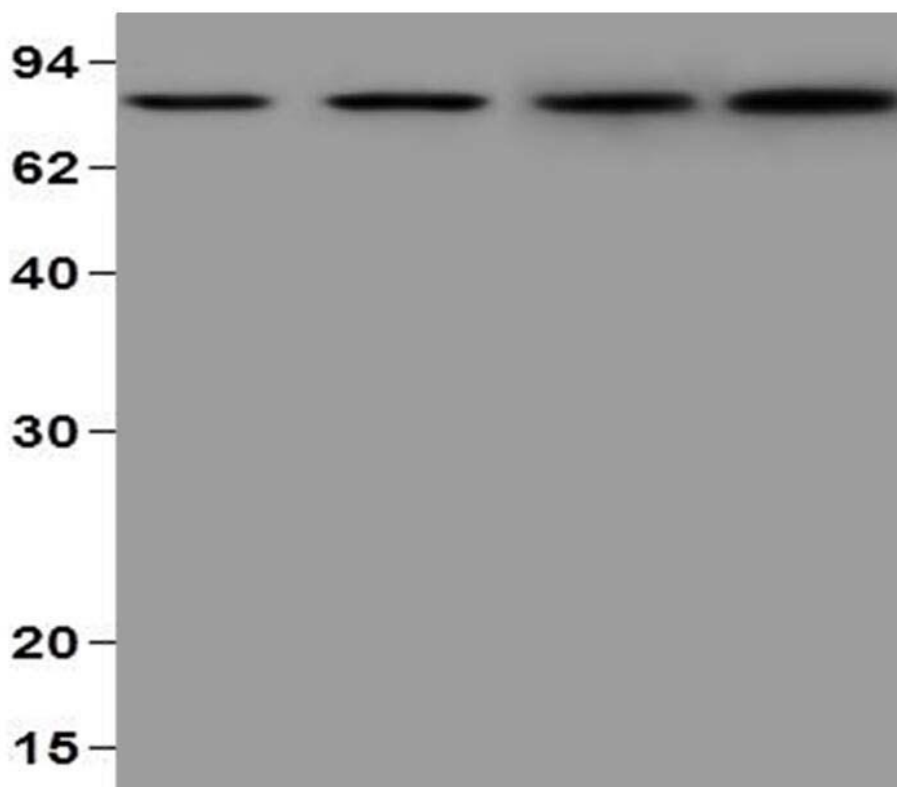

C1s

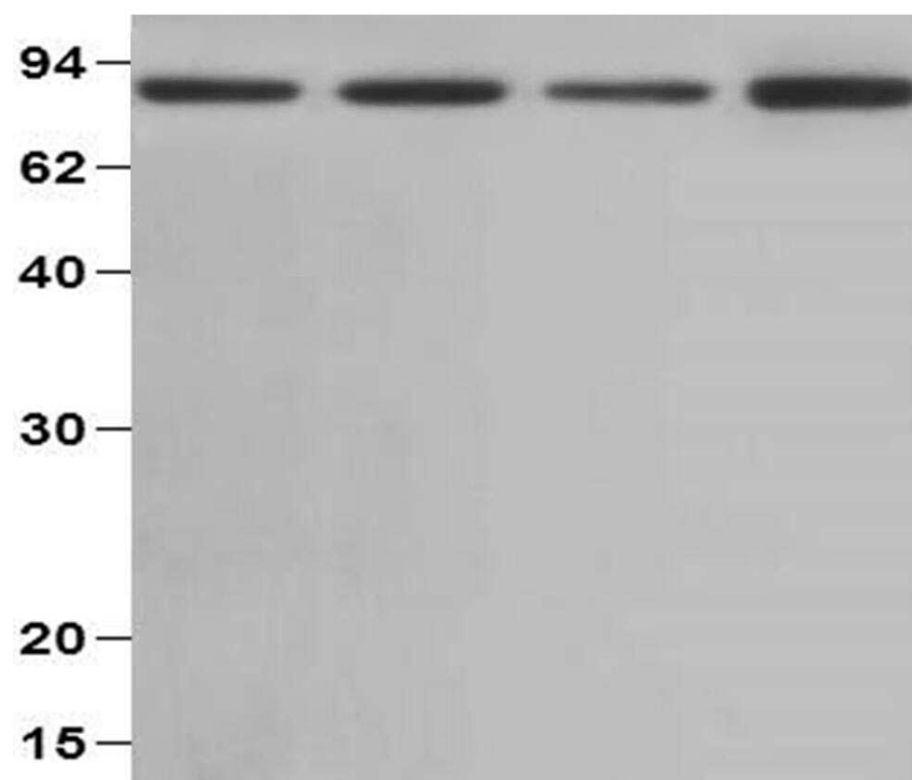

C2

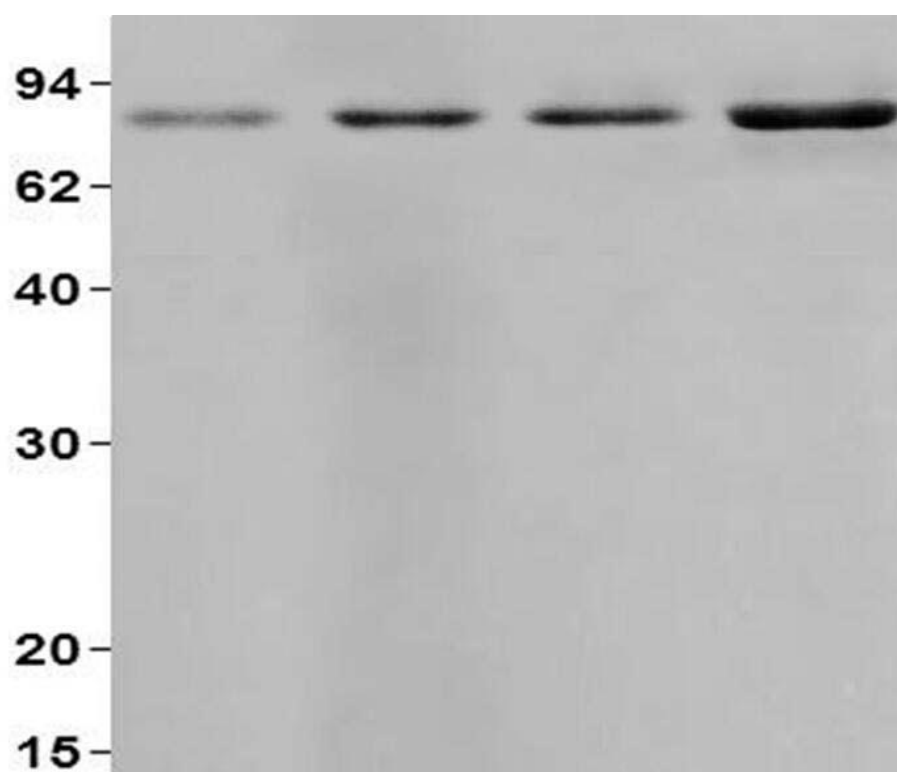

C3

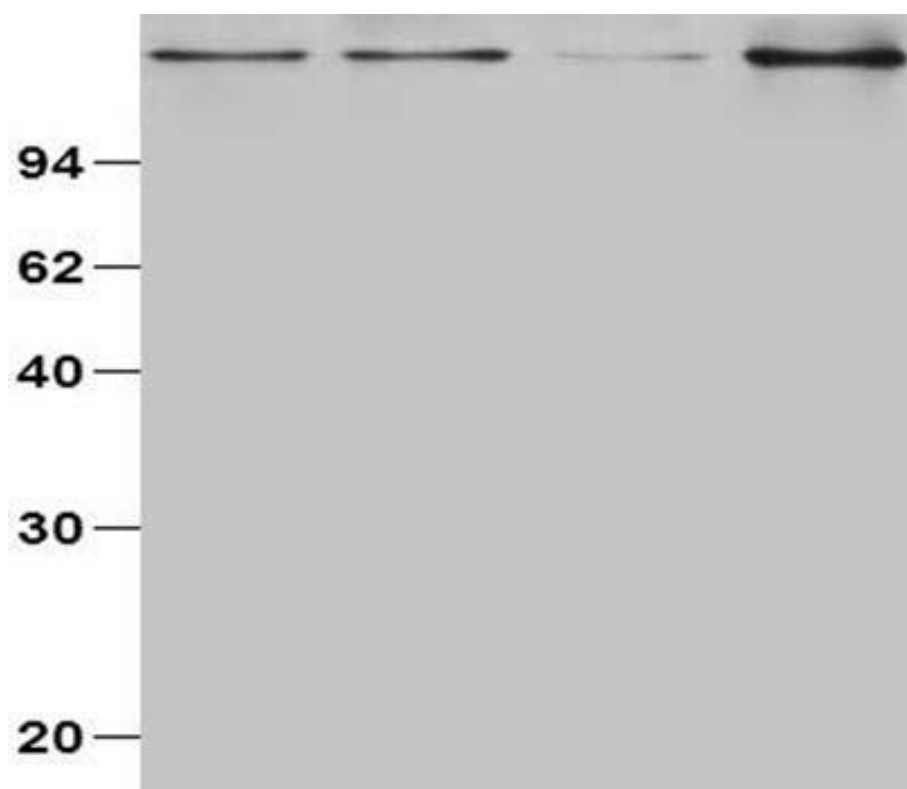

C4

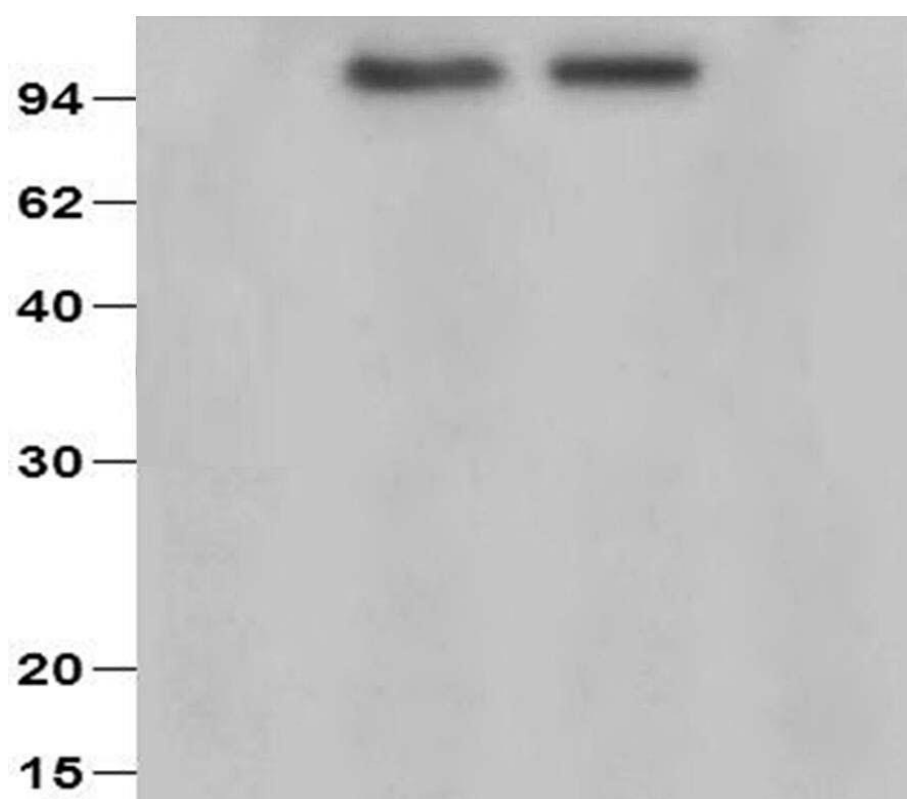

C5

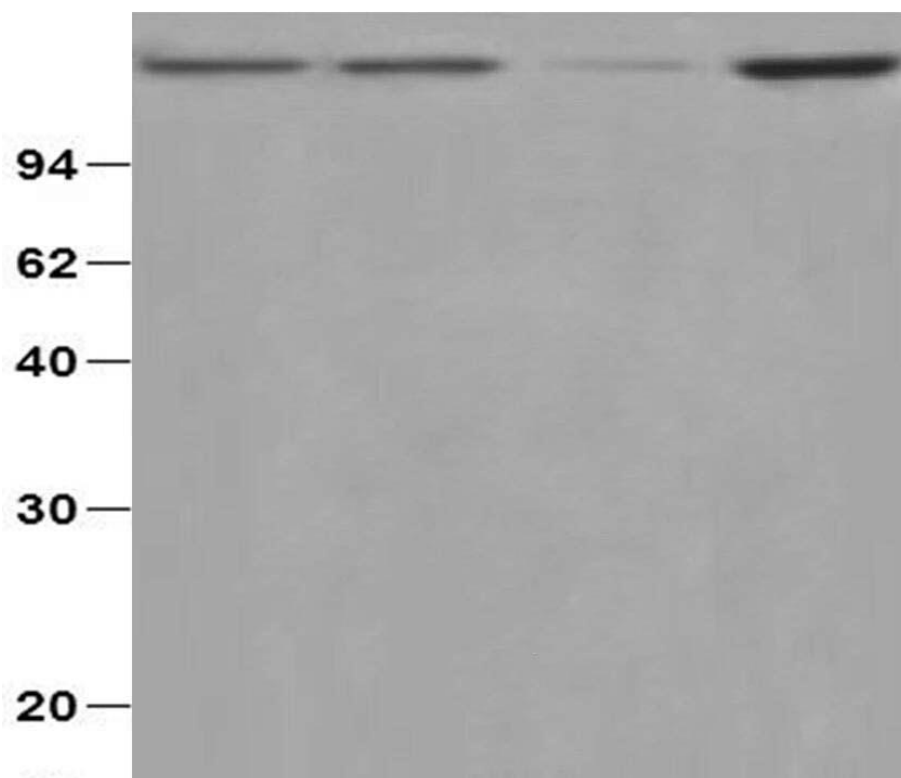

C9

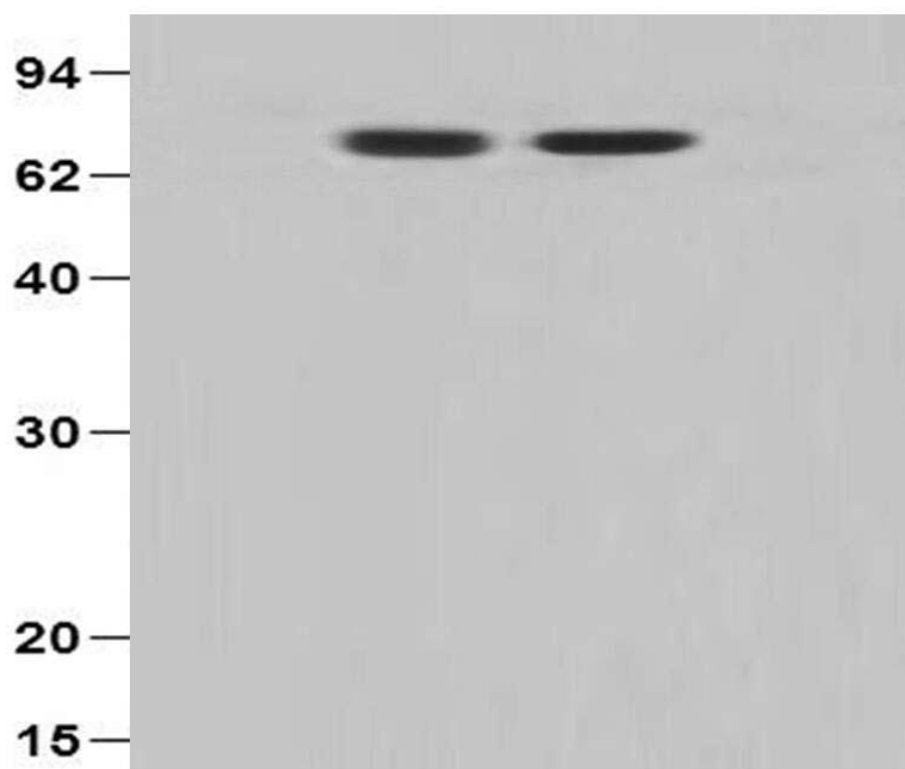

GAPDH1

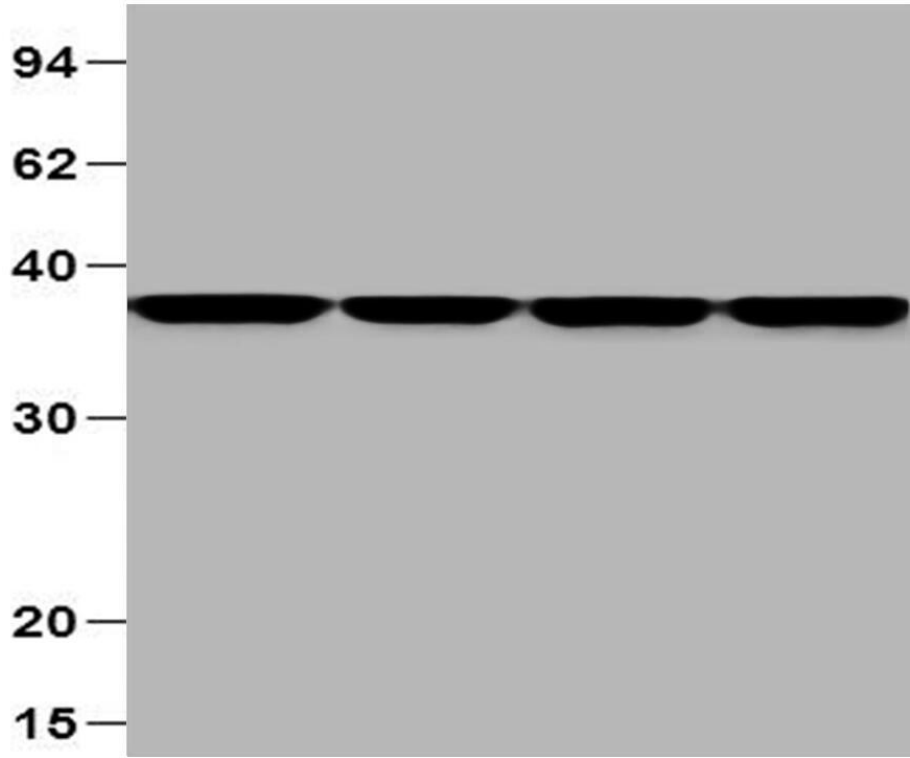

GAPDH2

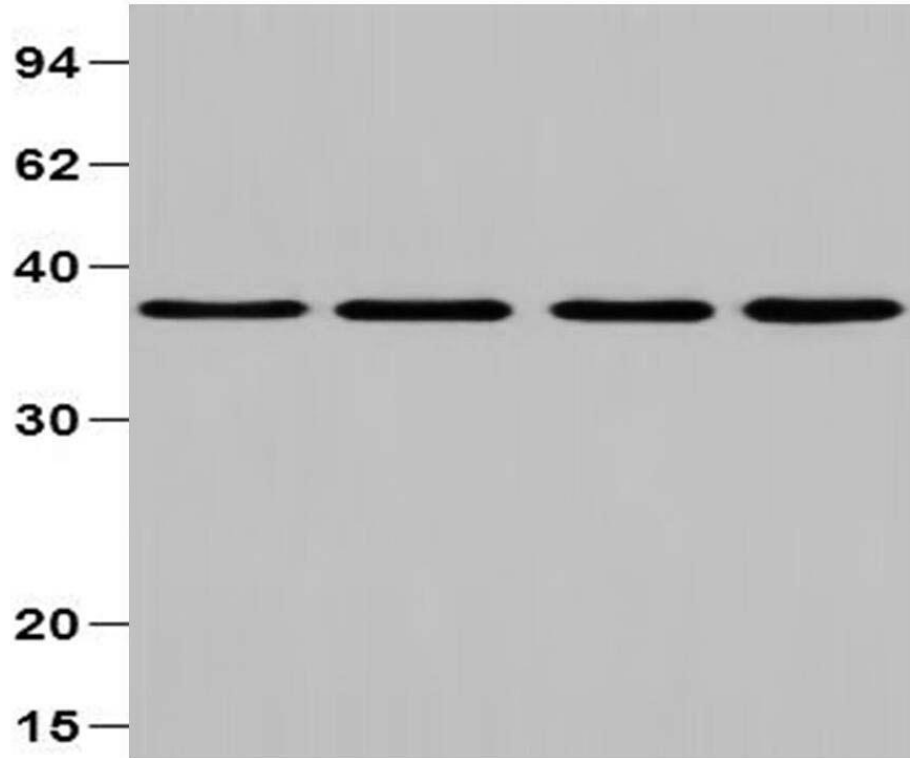

GAPDH3

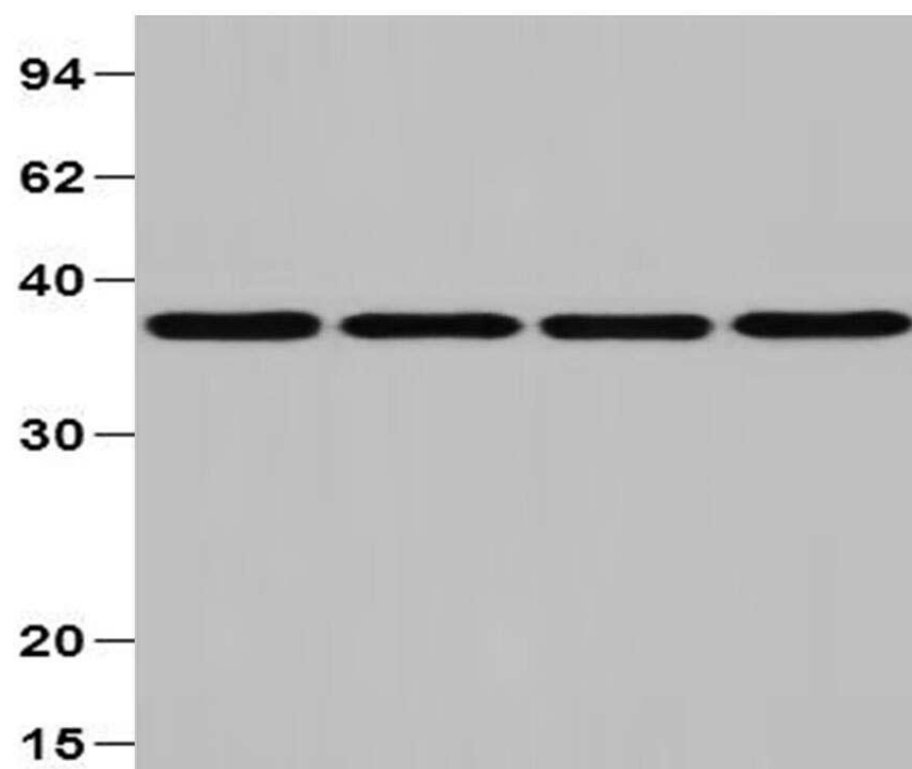

GAPDH4

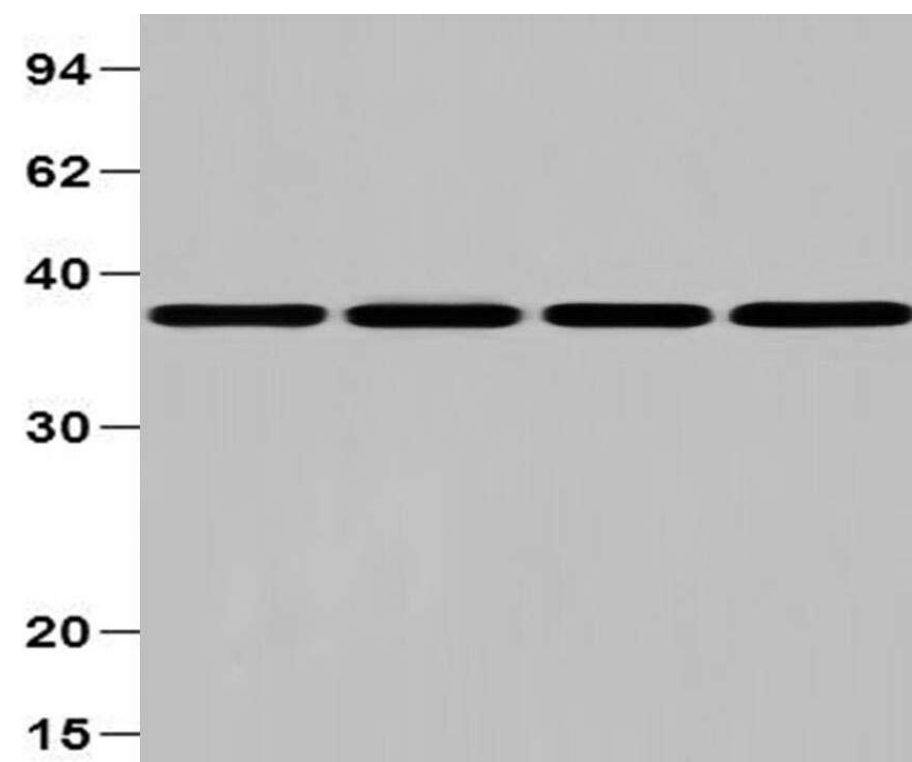

GAPDH5

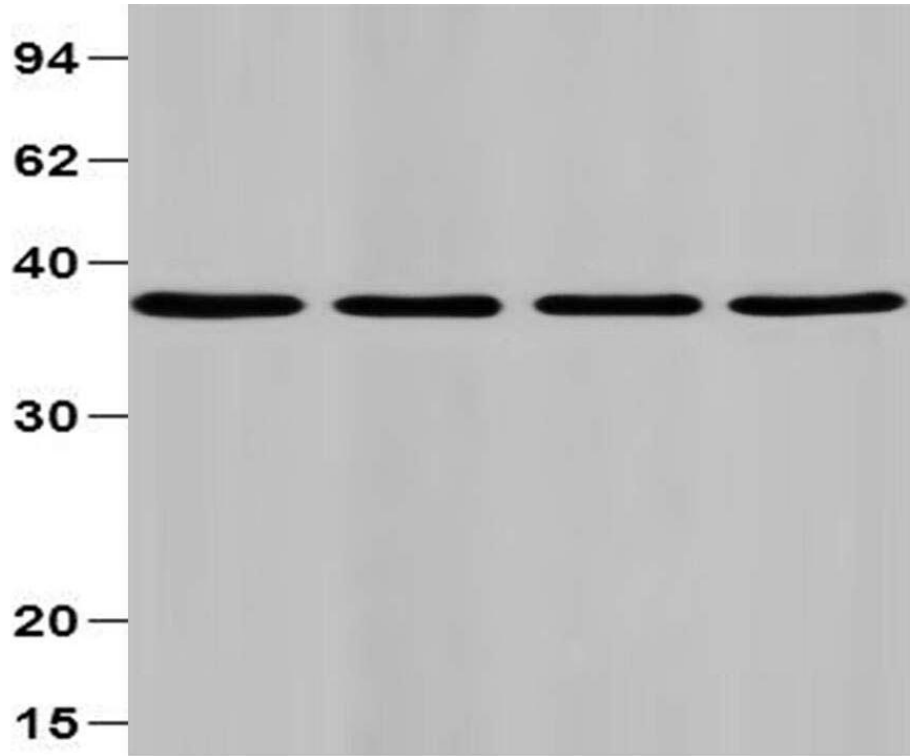

GAPDH6

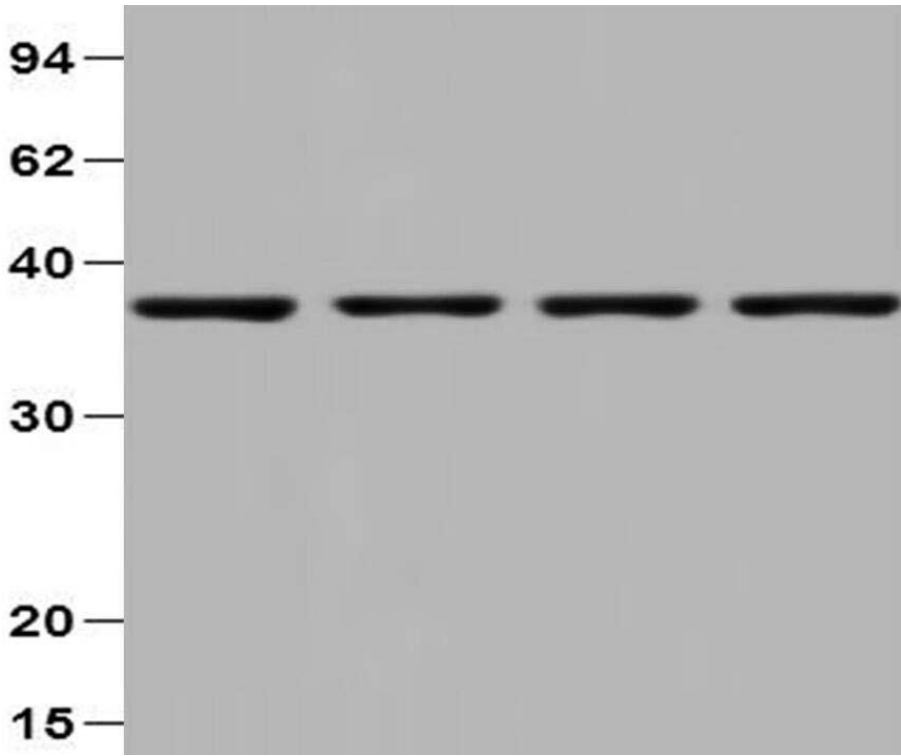

GAPDH7

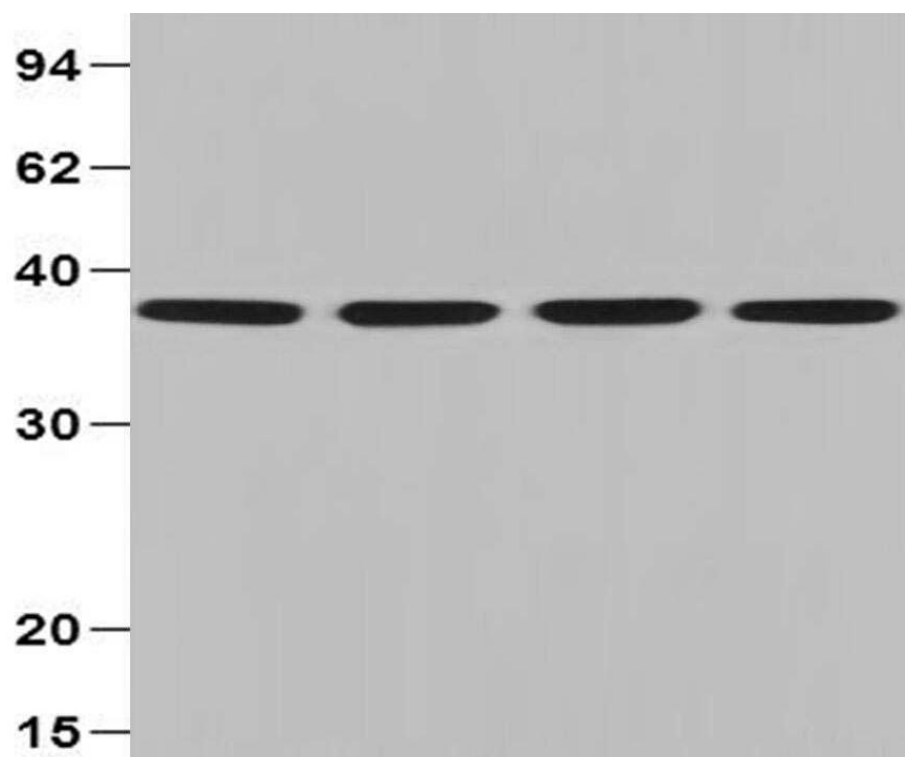

GAPDH8

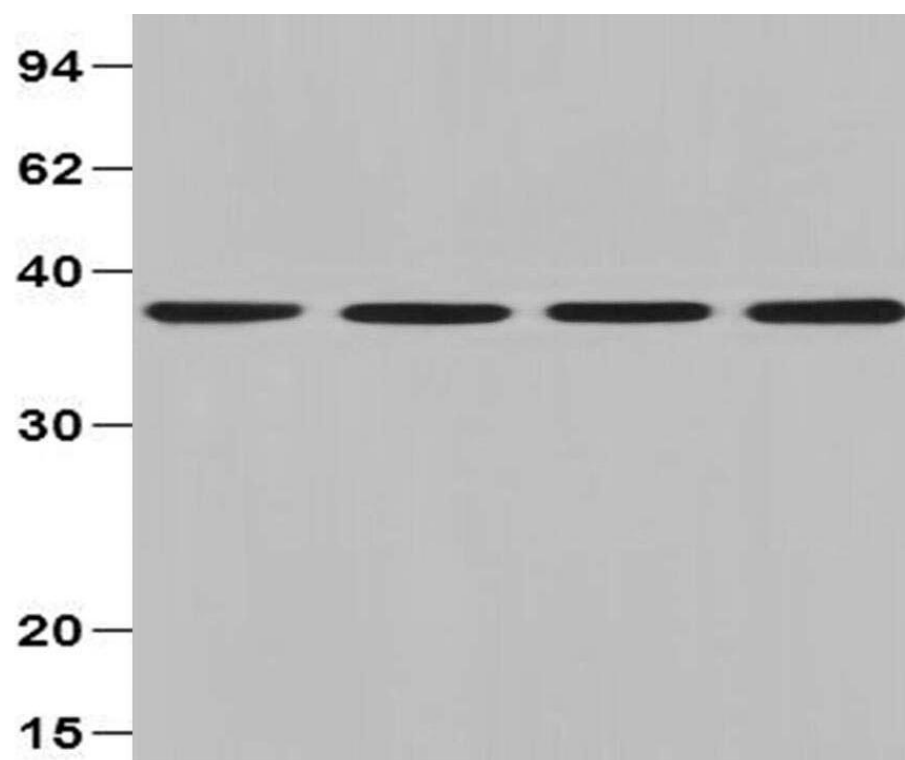

Supplement: s1 [file s1]
